# Supplementary material for: Candida albicans Strains Adapted to Caspofungin Due to Aneuploidy Become Highly Tolerant under Continued Drug Pressure
Source: MDPI journal article supplement (doi:10.3390/microorganisms11010023), 2022-12-21
Supplement: s1 [file s1]

Supplemental Materials:

**Table S1.** *C. albicans* caspofungin-adapted mutants that are used as parentals and their progenitor strains JRCT1 and SC5314.

| Strain     | Description                                       | Caspofungin MIC (µg/ml) | Source |
|------------|---------------------------------------------------|-------------------------|--------|
| JRCT1      | Progenitor strain, diploid                        | 0.031                   | [13]   |
| JMC200-2-5 | Same as JRCT1, but caspofungin-adapted            | 0.250                   | Same   |
| JMC160-2-5 | Same as JRCT1, but caspofungin-adapted            | 0.250                   | Same   |
| JMC120-1-6 | Same as JRCT1, but iso-Ch5R, caspofungin-adapted  | 0.062                   | Same   |
| JMC120-2-5 | Same as JRCT1, but iso-Ch5R, caspofungin-adapted  | 0.062                   | Same   |
| SC5314     | Progenitor strain, diploid                        | 0.062                   | Same   |
| SMC60-3-4  | Same as SC5314, but Ch5 mono, caspofungin-adapted | 0.125                   | Same   |
| SMC60-2-5  | Same as SC5314, but Ch5 mono, caspofungin-adapted | 0.125                   | Same   |

**Table S2.** List of mutants that evolved from caspofungin-adapted parental strains in the presence of caspofungin. Also listed are caspofungin-adapted parentals and MICs of all strains that were measured as 90% growth inhibition relative to a drug free control (see Figures S1 and S2).

| CAS-adapted parental                                                                                                                | CAS-evolved mutant | CAS MIC <sub>90</sub><br>(µg/ml)/fold change | MFG MIC <sub>90</sub><br>(µg/ml)/fold change | ANI MIC <sub>90</sub><br>(µg/ml)/fold change |
|-------------------------------------------------------------------------------------------------------------------------------------|--------------------|----------------------------------------------|----------------------------------------------|----------------------------------------------|
| <b>JMC200-2-5</b><br><b>No ploidy change</b><br><b>CAS MIC</b> 0.03 µg/ml<br><b>MFG MIC</b> 0.03 µg/ml<br><b>ANI MIC</b> 0.06 µg/ml | B1                 | 0.12/4-fold                                  | 0.06/2-fold                                  | 0.12/2-fold                                  |
|                                                                                                                                     | B2                 | 0.12/4-fold                                  | 0.03/No change                               | 0.06/No change                               |
|                                                                                                                                     | B3                 | 0.12/4-fold                                  | 0.03/No change                               | 0.03/No change                               |
|                                                                                                                                     | B5                 | 0.25/8-fold                                  | NA                                           | NA                                           |
| <b>JMC160-2-5</b><br><b>No ploidy change</b><br><b>CAS MIC</b> 0.03 µg/ml                                                           | B2-1               | 0.25/8-fold                                  | NA                                           | NA                                           |
|                                                                                                                                     | B2-2               | 0.12/4-fold                                  | NA                                           | NA                                           |
|                                                                                                                                     | B2-4               | 0.12/4-fold                                  | NA                                           | NA                                           |
|                                                                                                                                     | B2-7               | 0.06/2-fold                                  | NA                                           | NA                                           |
|                                                                                                                                     | B2-8               | 0.06/2-fold                                  | NA                                           | NA                                           |
|                                                                                                                                     | B2-10              | 0.06/2-fold                                  | NA                                           | NA                                           |
|                                                                                                                                     | B2-11              | 0.12/4-fold                                  | NA                                           | NA                                           |
|                                                                                                                                     | B2-14              | >4.0/128-fold*                               | NA                                           | NA                                           |
|                                                                                                                                     | B2-16              | 0.06/2-fold                                  | NA                                           | NA                                           |
|                                                                                                                                     | B2-20              | 0.25/8-fold                                  | NA                                           | NA                                           |
|                                                                                                                                     | B2-22              | 0.12/4-fold                                  | NA                                           | NA                                           |
|                                                                                                                                     | B2-23              | 0.12/4-fold                                  | NA                                           | NA                                           |
| <b>JMC120-2-5</b><br><b>iso-Ch5R</b><br><b>CAS MIC</b> 0.06 µg/ml<br><b>MFG MIC</b> 0.03 µg/ml                                      | C1                 | 0.5/8-fold                                   | 1.0/32-fold                                  | 0.500/16-fold                                |
|                                                                                                                                     | C2                 | 0.5/8-fold                                   | 1.0/32-fold                                  | 0.500/16-fold                                |
|                                                                                                                                     | C5                 | 0.5/8-fold                                   | >4.0/128-fold                                | 2.0/64-fold                                  |

|                                                                                                                                    |       |                 |              |              |
|------------------------------------------------------------------------------------------------------------------------------------|-------|-----------------|--------------|--------------|
| <b>ANI MIC</b> 0.03 µg/ml                                                                                                          |       |                 |              |              |
| <b>JMC120-1-6</b><br><b>iso-Ch5R</b><br><br><b>CAS MIC</b> 0.06 µg/ml<br><b>MFG MIC</b> 0.06 µg/ml<br><b>ANI MIC</b> 0.06 µg/ml    | C2-1  | 2.00/32-fold    | 4.0/64-fold  | 2.0/32-fold  |
|                                                                                                                                    | C2-6  | 0.5/8-fold      | 4.0/64-fold  | 2.0/32-fold  |
|                                                                                                                                    | C2-7  | 1.0/16-fold     | NA           | NA           |
|                                                                                                                                    | C2-8  | 0.25/4-fold     | 0.25/4-fold  | 0.5/8-fold   |
|                                                                                                                                    | C2-9  | 2.0/32-fold     | 0.5/8-fold   | 0.5/8-fold   |
|                                                                                                                                    | C2-10 | >4.0/64-fold    | 1.0/16-fold  | >4.0/64-fold |
|                                                                                                                                    | C2-11 | 0.5/8-fold      | 4.0/64-fold  | 1.0/16-fold  |
|                                                                                                                                    | C2-12 | 0.25/4-fold     | 0.25/4-fold  | 0.25/4-fold  |
|                                                                                                                                    | C2-13 | 2.0/32-fold     | >4.0/64-fold | 1.0/16-fold  |
|                                                                                                                                    | C2-14 | >4.0/64-fold    | >4.0/64-fold | 1.0/16-fold  |
| <b>SMC60-3-4</b><br><b>Ch5 monosomy</b><br><br><b>CAS MIC</b> 0.06 µg/ml<br><b>MFG MIC</b> 0.03 µg/ml<br><b>ANI MIC</b> 0.01 µg/ml | E2    | 1.0/16-fold     | 0.5/16-fold  | 0.25/16-fold |
|                                                                                                                                    | E3    | 1.0/16-fold     | 0.12/4-fold  | 4.0/256-fold |
|                                                                                                                                    | E4    | 1.0/16-fold     | 0.5/16-fold  | 0.25/16-fold |
|                                                                                                                                    | E5    | 2.0/32-fold     | 4.0/128-fold | 2.0/128-fold |
|                                                                                                                                    | E6    | 2.0/32-fold     | 0.5/16-fold  | 0.25/16-fold |
|                                                                                                                                    | E7    | 2.0/32-fold     | 0.5/16-fold  | 1.0/64-fold  |
|                                                                                                                                    | E8    | 0.12/2-fold     | NA           | NA           |
|                                                                                                                                    | E9    | 4.0/64-fold     | 2.0/64-fold  | 2.0/128-fold |
|                                                                                                                                    | E10   | 2.0/32-fold     | 1.0/32-fold  | 2.0/128-fold |
|                                                                                                                                    | E11   | 4.0/64-fold     | 0.25/8-fold  | 0.12/8-fold  |
|                                                                                                                                    | E12   | 0.12/2-fold     | NA           | NA           |
| <b>SMC60-2-5</b><br><b>Ch5 monosomy</b><br><br><b>CAS MIC</b> 0.12 µg/ml                                                           | E2-1  | 2.0/16-fold     | 2.0/64-fold  | 4.0/256-fold |
|                                                                                                                                    | E2-2  | 0.12/ No change | NA           | NA           |
|                                                                                                                                    | E2-3  | 0.25/2-fold     | NA           | NA           |
|                                                                                                                                    | E2-4  | >4.0/32-fold    | 0.25/8-fold  | 4.0/256-fold |
|                                                                                                                                    | E2-5  | 0.5/4-fold      | 2.0/64-fold  | 0.06/4-fold  |

|                                                        |       |                  |              |              |
|--------------------------------------------------------|-------|------------------|--------------|--------------|
| <b>MFG MIC</b> 0.03 µg/ml<br><b>ANI MIC</b> 0.01 µg/ml | E2-6  | >4.0/32-fold     | 4.0/128-fold | 2.0/128-fold |
|                                                        | E2-7  | 0.5/4-fold       | 0.5/16-fold  | 0.5/32-fold  |
|                                                        | E2-8  | 1.0/8-fold       | 0.5/16-fold  | 4.0/256-fold |
|                                                        | E2-9  | 0.12/ No change  | 1.0/32-fold  | 0.06/4-fold  |
|                                                        | E2-10 | 2.0/16-fold      | 0.5/16-fold  | 2.0/128-fold |
|                                                        | E2-11 | 0.25/2-fold      | NA           | NA           |
|                                                        | E2-12 | 0.06/ No change  | NA           | NA           |
|                                                        | E2-13 | 0.06/ No change  | NA           | NA           |
|                                                        | E2-14 | 0.12/ No change  | NA           | NA           |
|                                                        | E2-15 | 0.12/ No change  | NA           | NA           |
|                                                        | E2-16 | 0.06/ No change  | NA           | NA           |
|                                                        | E2-17 | >4.0/32-fold     | 4.0/128-fold | 0.12/8-fold  |
|                                                        | E2-18 | >0.06/ No change | NA           | NA           |
|                                                        | E2-19 | 0.12/ No change  | NA           | NA           |
|                                                        | E2-20 | 0.12/ No change  | NA           | NA           |

\*Note that this evolved mutant showed very clear inhibition of growth at concentration of 0.25

µg/ml, which is 8-fold increase (see Fig S2A). However, it showed ~10% of growth at every higher concentration of caspofungin. NA stands for Not Available.

| Primer name and purpose                                    | Sequence                    |
|------------------------------------------------------------|-----------------------------|
| <b>Amplification of HS1 and HS2 regions of <i>FKS1</i></b> |                             |
| HS1-A, F                                                   | CGGTGCTCAACATTGAGTCGTCGTAT  |
| HS1-A, R                                                   | TTGATTTCATTTCCTGGTAGCTAAA   |
| HS2-A, F                                                   | TGCTGGTATGAATGCCATGATGAGAGG |
| HS2-A, R                                                   | GGTGCTTGCCAATGAGAACTGTACCA  |
| <b>Sequencing of HS1 and HS2 regions of <i>FKS1</i></b>    |                             |
| HS1-S, F                                                   | CGGCATATGCTGTGTCGATTGT      |
| HS1-S, R                                                   | TGAACGACCAATGGAGAAGA        |
| HS2-S, F                                                   | TTGGTGCTGGTATGGGAGAACA      |
| HS2-S, R                                                   | GCACCACCAACGGTCAAATCA       |

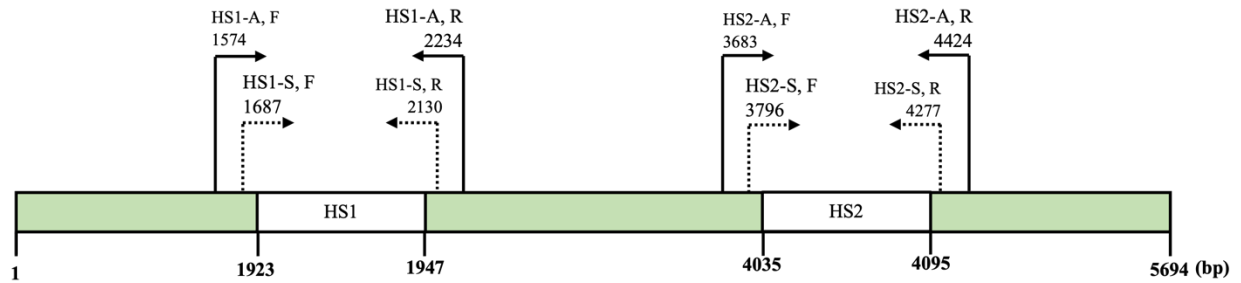

**Figure S1.** Primers and sequences. Shown below is a cartoon of *C. albicans FKS1* gene showing the hot spot regions HS1 and HS2. Solid arrows represent the amplification primers and dashed arrows represent the sequencing primers.

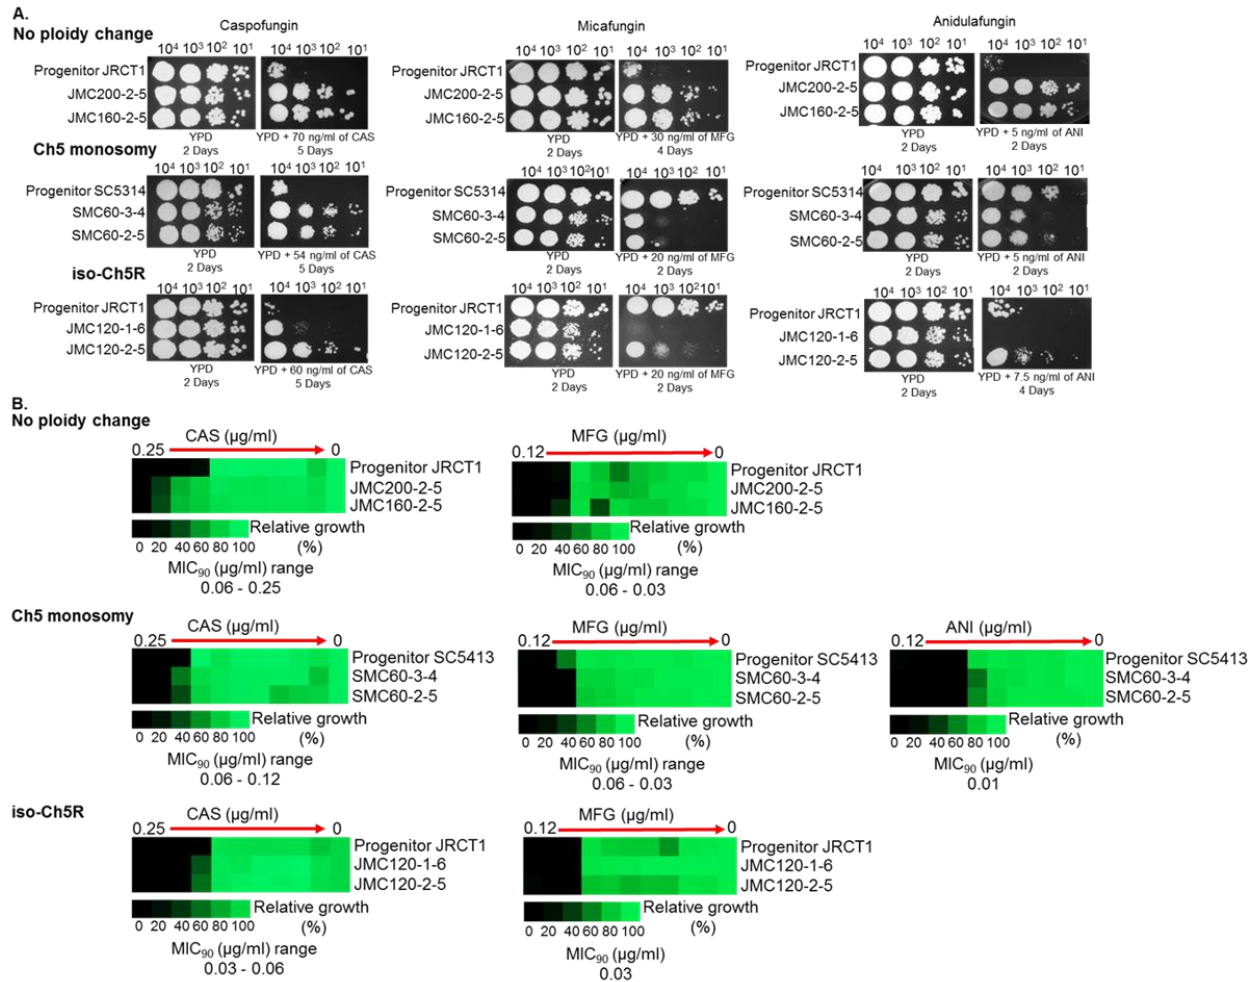

**Figure S2.** Different classes of caspofungin-adapted parental mutants exhibit different echinocandin (ECN) susceptibilities. CAS, MIC and ANI refer to caspofungin, micafungin and anidulafungin, respectively. **A.** The spot assay shows difference of growth on YPD medium supplemented with ECN drugs, as indicated. The plates were incubated at 37 °C. The names of progenitor strains JRCT1 or SC5314, caspofungin-adapted parental mutants and Ch5 condition (no ploidy change, Ch5 monosomy and iso-Ch5R) are indicated on left. Dilution factor, ECNs concentration and days of plate incubation are indicated on top and bottom of spot assays images, respectively. **B.** The heat maps show the growth of the strains in (A) by broth microdilution method in the presence of ECN drugs, as indicated. The assay was conducted

according to CLSI method in YPD medium with maximum concentration of CAS, MIC and ANI of 0.250 µg/ml, 0.125 µg/ml & 0.125 µg/ml respectively, with 2-fold serial dilution. A total of  $10^3$  cells were inoculated into each well of 96-well plates in triplicates or quadruplicates (technical replicates) and plates were incubated at 35 °C for 48h. Control wells without drug or without cells were included. The no-cell control was used to subtract the background. The no-drug control was used for normalization. MICs were determined as 90% growth inhibition relative to a drug free control. The color bar for percent growth is presented below each panel. Note that spot assay in (A) resolved unclear MICs for MFG and ANI by broth microdilution in (B).

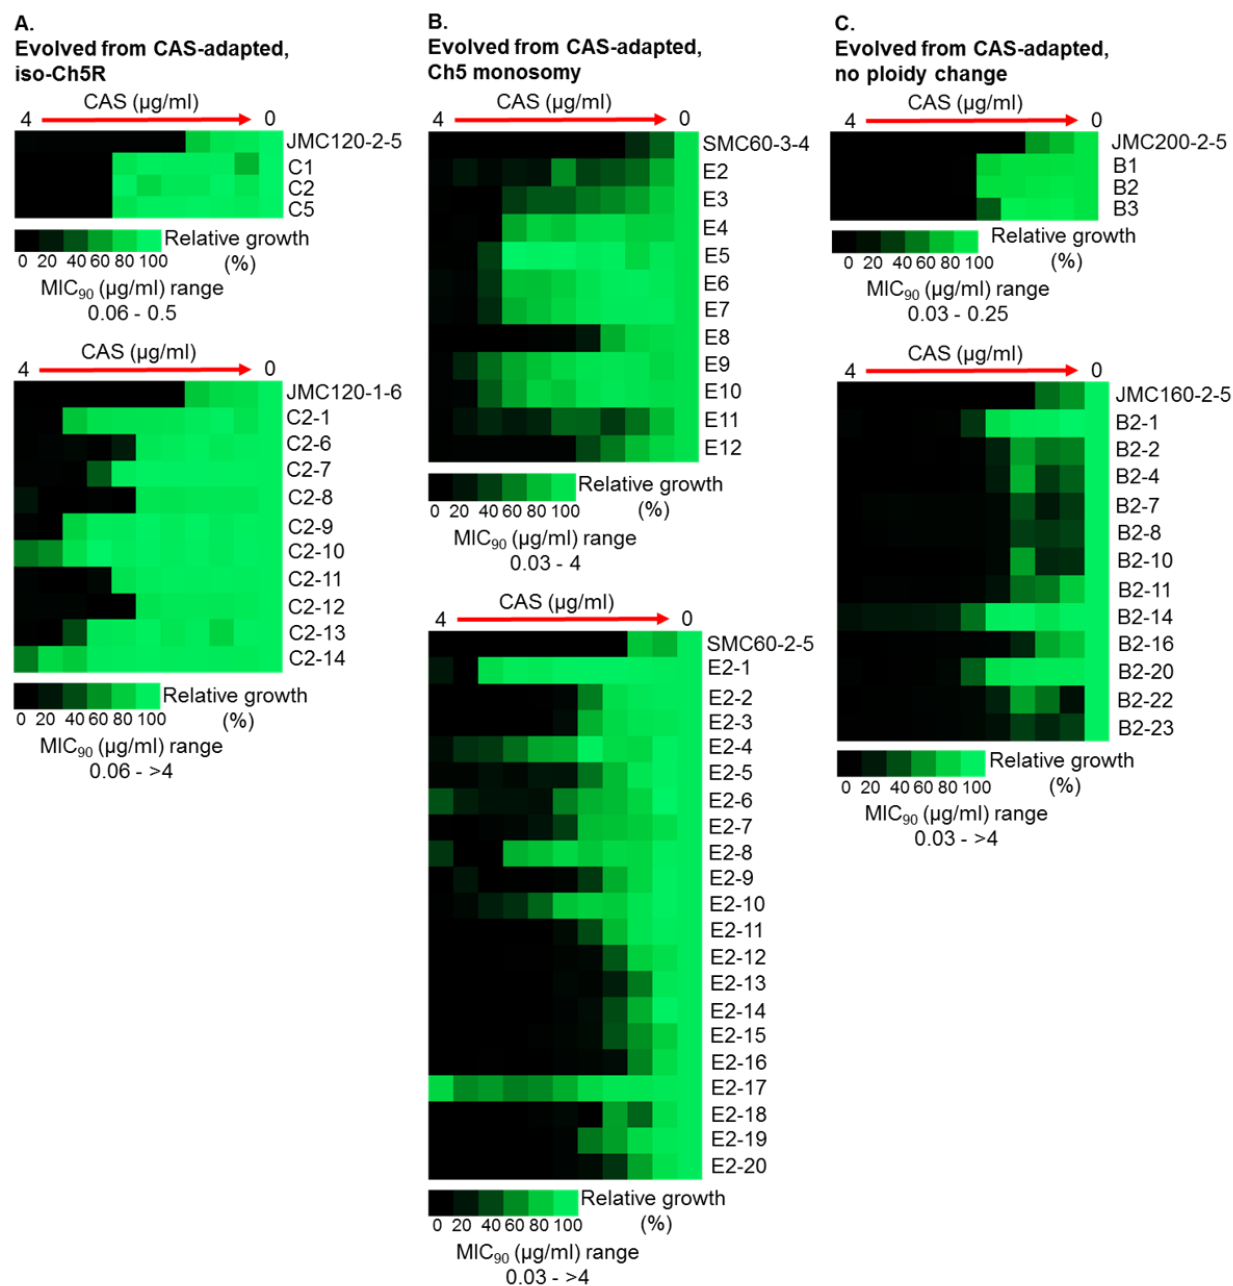

**Figure S3a.** Caspofungin-evolved mutants exhibit increased caspofungin MICs, as presented with the heat maps. Shown are derivatives of parentals with iso-Ch5R, Ch5 monosomy or no ploidy change as indicated. Names of strains are indicated on the left. Broth microdilution assay was performed according to CLSI method in YPD medium including maximum CAS concentration of 4  $\mu\text{g/ml}$ . For more details, see Figure S2B legend. Color bar for % growth is



presented for each panel underneath. MICs were measured as 90% growth inhibition relative to a drug free control.

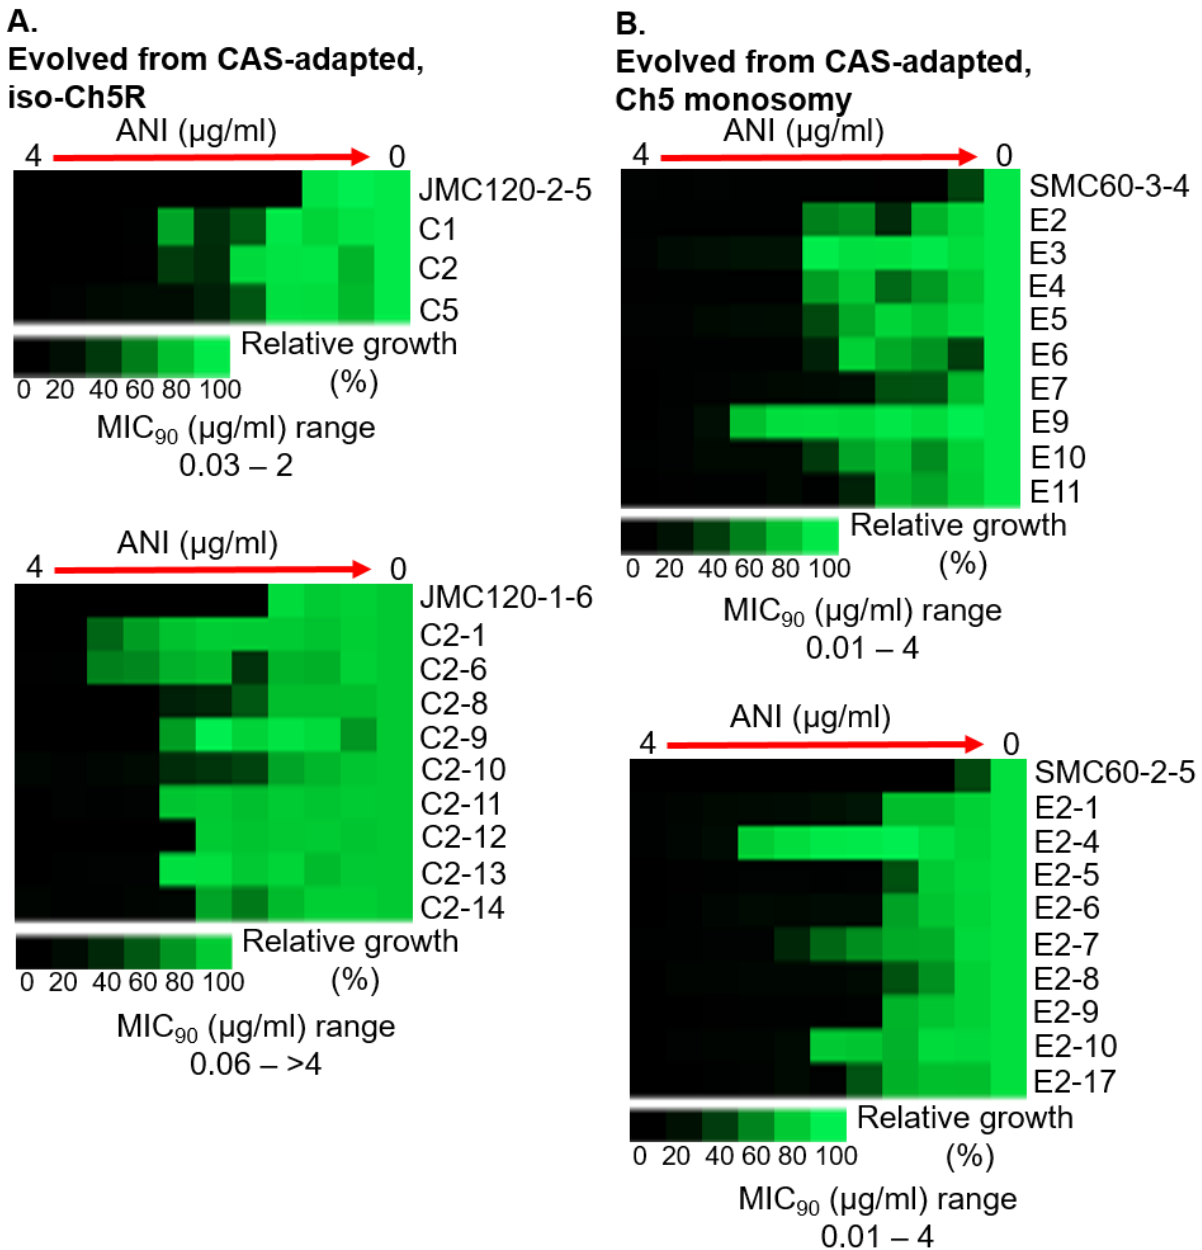

**Figure S3b.** Caspofungin-evolved mutants exhibit increased anidulafungin MICs, as shown with the heat maps. Shown are derivatives of parentals with iso-Ch5R and Ch5 monosomy. For more details, see legends of Figures S2B and S3a. Note that derivatives of no ploidy change strains showed no change of ANI MICs.

**A.**

**Evolved from CAS-adapted,  
iso-Ch5R**

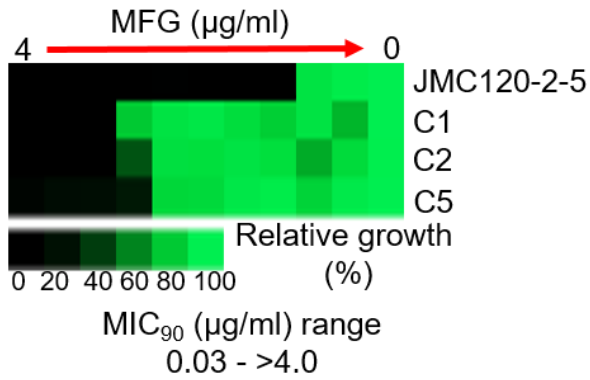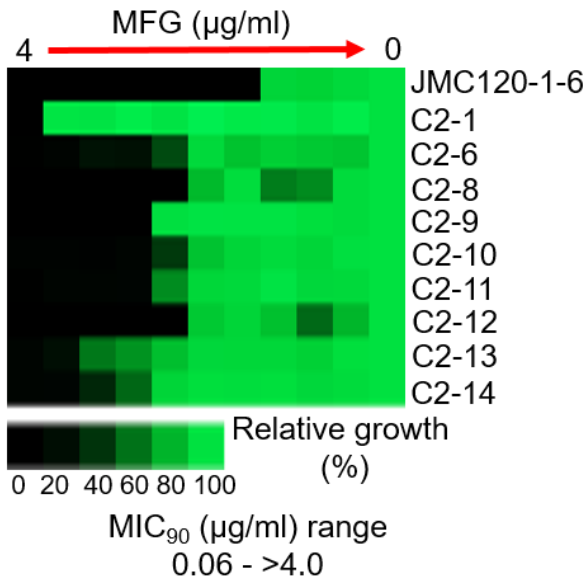

**B.**

**Evolved from CAS-adapted,  
Ch5 monosomy**

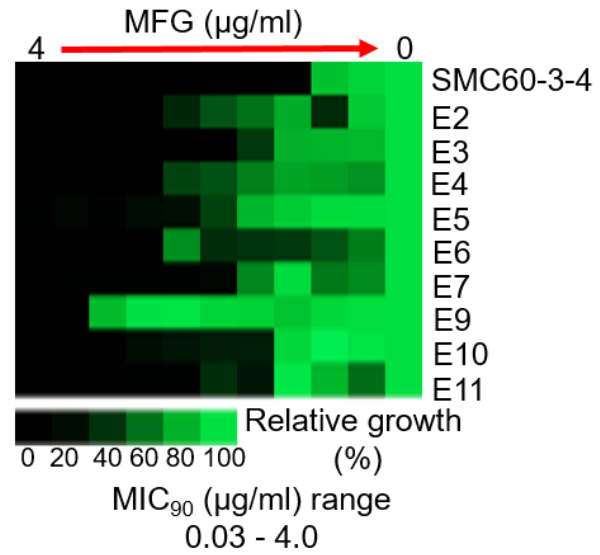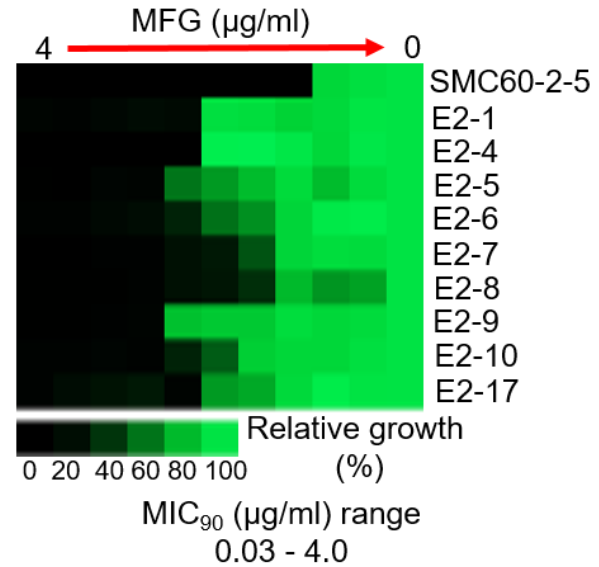

**Figure S3c.** Caspofungin-evolved mutants exhibit increased micafungin MICs, as shown with the heat maps. Shown are derivatives of parentals with iso-Ch5R and Ch5 monosomy. For more details, see legends of Figures S2B and S3a.
